# Supplementary material for: Highly accurate dating of micrometre-scale baddeleyite domains through combined focused ion beam extraction and U-Pb thermal ionisation mass spectrometry (FIB-TIMS)
Source: Copernicus journal article supplement (doi:10.5194/gchron-2019-17), 2019-11-29
Supplement: Supplementary file 1 [file gchron-2019-17-supplement.pdf]

| Fraction                       | Weight | U      | Th/U | Pbtot   | PbCom | 206Pb/204Pb | 207Pb/204Pb | %Pb206 | %Pb207 | 207Pb/235U | 2 Sig    | 206Pb/238UC | 2 Sig    | Rho       | 207Pb/206PbC | 2 Sig    | 206Pb/238UC | 2 Sig | 207Pb/235U | 2 Sig | 207Pb/206PbC | 2 Sig | %Disc |
|--------------------------------|--------|--------|------|---------|-------|-------------|-------------|--------|--------|------------|----------|-------------|----------|-----------|--------------|----------|-------------|-------|------------|-------|--------------|-------|-------|
|                                | (mg)   | (ppm)  |      | (pg)    | (pg)  | measured    | measured    | com    | com    |            |          |             |          | Concordia |              |          | Age (Ma)    |       | Age (Ma)   |       | Age (Ma)     |       |       |
| Whole grain #1                 | 0.0006 | 430.7  | 0.02 | 94.30   | 0.17  | 36226       | 4626        | 0.05   | 0.34   | 6.58       | 1.58E-02 | 0.375       | 7.61E-04 | 0.94      | 0.13         | 1.06E-04 | 2051.97     | 3.57  | 2056.72    | 2.12  | 2061.48      | 1.46  | 0.5   |
| Whole grain #2                 | 0.0015 | 277.1  | 0.01 | 151.40  | 0.18  | 54821       | 6991        | 0.03   | 0.23   | 6.57       | 1.51E-02 | 0.375       | 7.13E-04 | 0.94      | 0.13         | 1.05E-04 | 2050.92     | 3.34  | 2055.83    | 2.02  | 2060.76      | 1.45  | 0.6   |
| 5 chips from mount             | 0.0008 | 1590.8 | 0.01 | 463.58  | 1.09  | 28030       | 3583        | 0.07   | 0.44   | 6.58       | 1.69E-02 | 0.375       | 8.57E-04 | 0.91      | 0.13         | 1.37E-04 | 2051.90     | 4.02  | 2056.76    | 2.26  | 2061.65      | 1.90  | 0.6   |
| 1 chip from mount              | 0.0013 | 3027.4 | 0.01 | 1320.74 | 12.29 | 7104        | 918         | 0.26   | 1.70   | 6.07       | 1.54E-02 | 0.345       | 7.16E-04 | 0.92      | 0.13         | 1.32E-04 | 1912.19     | 3.43  | 1985.34    | 2.22  | 2062.40      | 1.82  | 8.4   |
| 50x50x50 um cube               | 0.0004 | 443.2  | 0.02 | 61.64   | 1.91  | 2143        | 286         | 0.86   | 5.28   | 6.26       | 2.33E-02 | 0.357       | 9.23E-04 | 0.78      | 0.13         | 2.99E-04 | 1968.16     | 4.38  | 2013.01    | 3.26  | 2059.34      | 4.15  | 5.1   |
| Flake (subset of rectangle #2) | 0.0002 | 106.3  | 0.01 | 5.76    | 0.33  | 1163        | 161         | 1.57   | 9.02   | 6.49       | 5.52E-02 | 0.372       | 2.67E-03 | 0.88      | 0.13         | 5.03E-04 | 2037.60     | 12.53 | 2044.14    | 7.48  | 2050.74      | 7.03  | 0.7   |
| Flake (subset of rectangle #2) | 0.0000 | 253.6  | 0.01 | 4.51    | 0.67  | 464         | 72          | 3.82   | 17.85  | 6.41       | 6.64E-02 | 0.366       | 3.56E-03 | 0.91      | 0.13         | 5.57E-04 | 2012.84     | 16.81 | 2033.98    | 9.08  | 2055.50      | 7.75  | 2.4   |
| 200x50x50 um rectangle #1      | 0.0025 | 284.2  | 0.02 | 246.35  | 0.66  | 24743       | 3162        | 0.07   | 0.49   | 6.25       | 1.67E-02 | 0.356       | 8.50E-04 | 0.94      | 0.13         | 1.20E-04 | 1963.80     | 4.04  | 2011.26    | 2.34  | 2060.36      | 1.66  | 5.4   |
| 100x100x100 um cube            | 0.0050 | 397.1  | 0.45 | 757.05  | 0.54  | 83466       | 10639       | 0.02   | 0.15   | 6.20       | 1.52E-02 | 0.353       | 7.34E-04 | 0.95      | 0.13         | 9.98E-05 | 1950.17     | 3.50  | 2004.54    | 2.15  | 2061.05      | 1.38  | 6.2   |
| 200x50x50 um rectangle #2      | 0.0025 | 352.3  | 0.02 | 300.83  | 1.28  | 15456       | 1981        | 0.12   | 0.80   | 6.16       | 1.49E-02 | 0.351       | 7.30E-04 | 0.91      | 0.13         | 1.29E-04 | 1939.56     | 3.48  | 1998.92    | 2.11  | 2060.86      | 1.79  | 6.8   |
| 5x15um domain #2               | 0.0001 | 509.6  | 0.04 | 13.11   | 0.25  | 3499        | 457         | 0.53   | 3.37   | 5.67       | 2.27E-02 | 0.324       | 1.15E-03 | 0.90      | 0.13         | 2.18E-04 | 1810.68     | 5.59  | 1927.07    | 3.45  | 2054.68      | 3.03  | 13.6  |
| 5x15um domain #1               | 0.0001 | 508.4  | 0.02 | 15.98   | 6.24  | 187         | 37          | 9.04   | 30.06  | 6.35       | 1.85E-01 | 0.363       | 1.90E-03 | 0.88      | 0.13         | 3.14E-03 | 1994.53     | 8.99  | 2026.03    | 25.68 | 2058.28      | 43.86 | 3.6   |
